# Supplementary material
Source: PubMed Central journal article supplement (PMC3087478)
Supplement: supp_blood-2010-07-299248_Document1.pdf [file supp_blood-2010-07-299248_Document1.pdf]

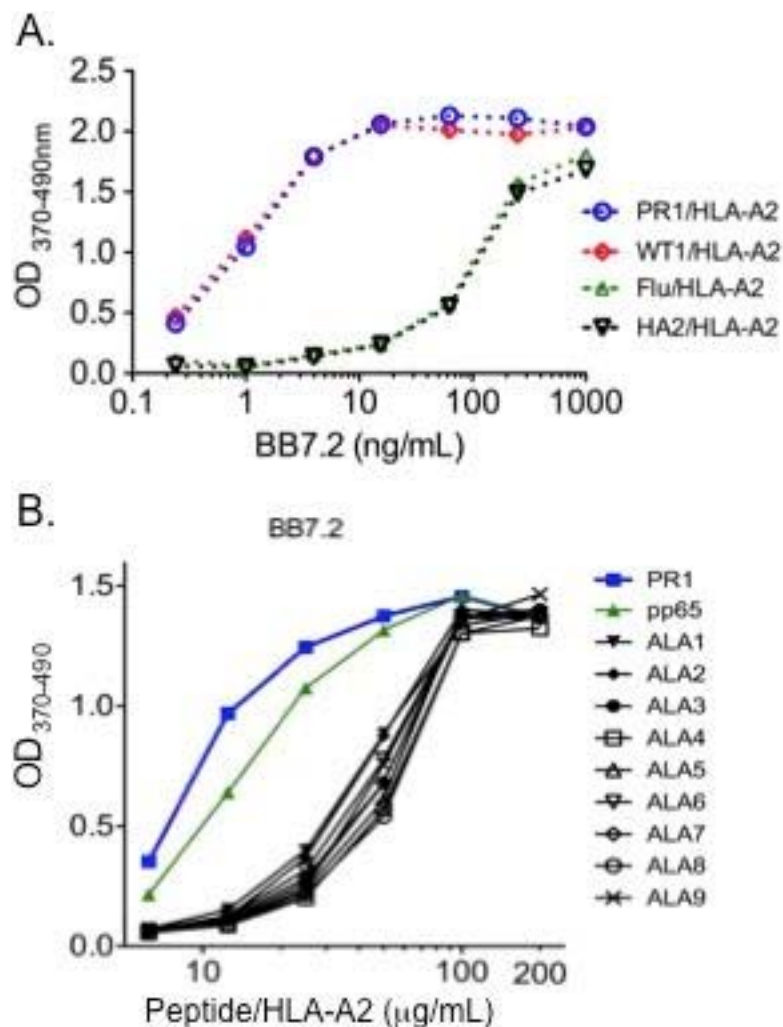

**Figure S1**

(A) ELISA assay showing binding of BB7.2, a control HLA-A2 specific antibody, to monomers consisting of HLA-A2 and PR1 (blue circles) or control peptides WT1 (red diamonds), Flu (green triangles) and HA-2 (black triangles), which increases with increasing BB7.2 concentration. (B) Control antibody BB7.2, which binds HLA-A2 independent of the bound peptide, shows similar binding to PR1/HLA-A2 and pp65/HLA-A2 monomer in ELISA. BB7.2 binding to monomers consisting of HLA-A2,  $\beta$ 2m and modified PR1 peptide (VLQELNVTV) analogues constructed with alanine substitutions at position 1 to 9 (ALA1-ALA9). BB7.2 shows similar binding to all modified peptide/HLA-A2 monomers.

A. AML1

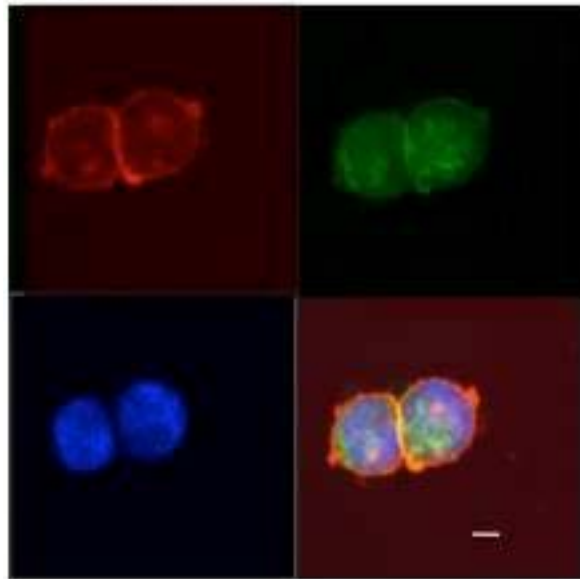

B. AML2

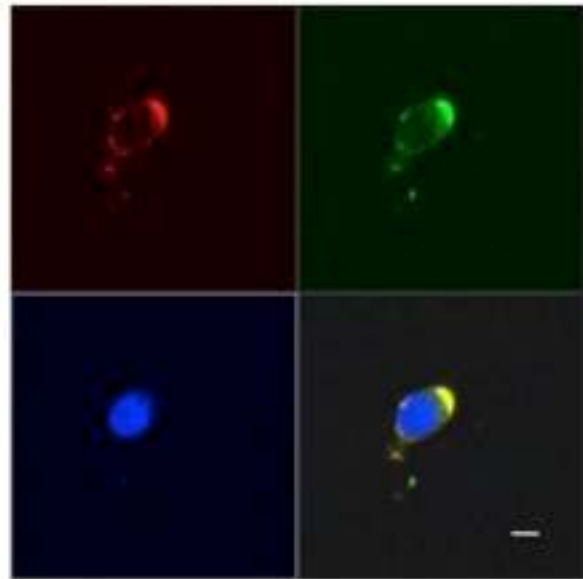

C. AML3

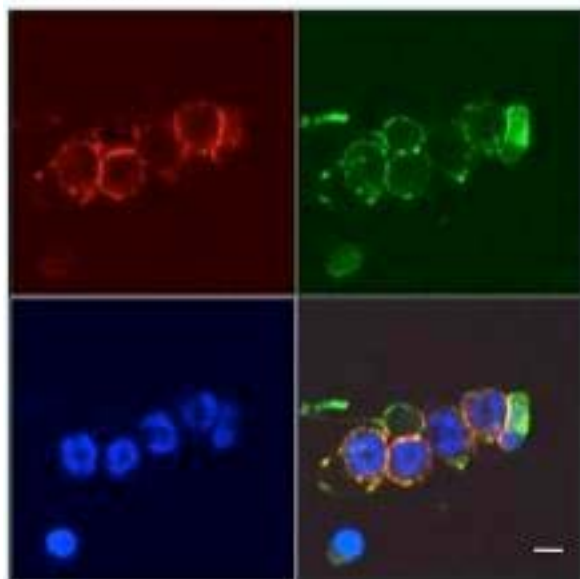

D. AML5

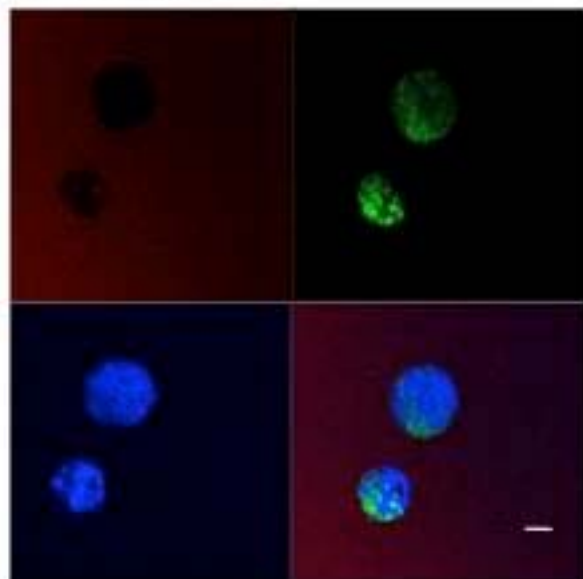

**Figure S2**

Heterogeneous PR1 expression on AML cells. Primary leukemia cells (from patients in Table 1) were co-stained with Alexa Fluor (AF) 488-conjugated anti-HLA-A2 (green) (left panels) and AF647-conjugated 8F4 (red) and Dapi (blue, middle panels). **(A)** AML-M1; **(B)** AML-M2; **(C)** AML-M5; **(D)** AML-M1. Images were viewed using Leica Microsystems SP2 SE confocal microscope (Illinois, USA) with 10x/25 air, 63x/1.4 oil objectives and Leica Type F immersion liquid. Leica LCS software (version 2.61) was used for image analysis. Scale bar on merged images, 10 $\mu$ m.

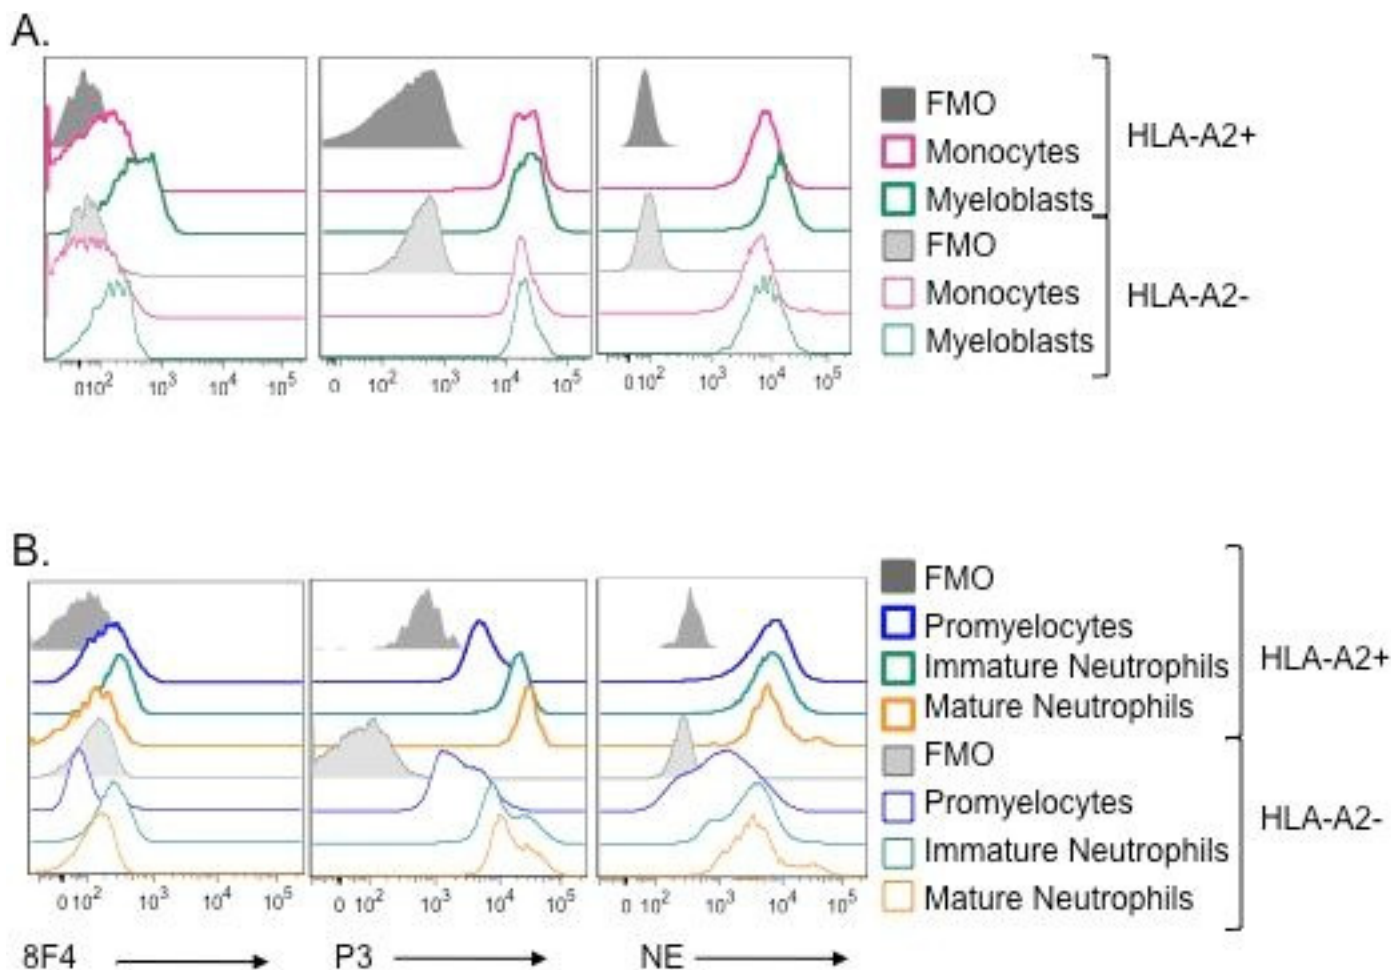

### Figure S3

Expression of HLA-A2/PR1, NE and P3 during normal granulopoiesis in healthy bone marrow. Healthy donor ND10 fresh bone marrow cells were stained with fluorochrome-conjugated antibodies directed to CD45, CD33, CD11b, CD16, and HLA-A2 and 8F4, or NE and P3. Granulocytes were identified based on scatter characteristics and then examined for expression of CD11b and CD16.

Promyelocytes were identified as CD11b<sup>hi</sup>/CD16<sup>lo</sup>; Immature Granulocytes were CD11b<sup>low</sup>/CD16<sup>lo</sup>; Mature Granulocytes stained brightly for both markers CD11b and CD16. Cells were fixed and permeabilized prior to NE and P3 staining to measure intracellular proteases. **(A)** P3 and NE are expressed in myeloblasts and monocytes, and PR1/HLA-A2 is weakly expressed on HLA-A2+ myeloblasts. **(B)** PR1/HLA-A2 is weakly expressed on promyelocytes and immature granulocytes, but not on mature granulocytes, while P3 and NE are expressed in all myeloid cells.

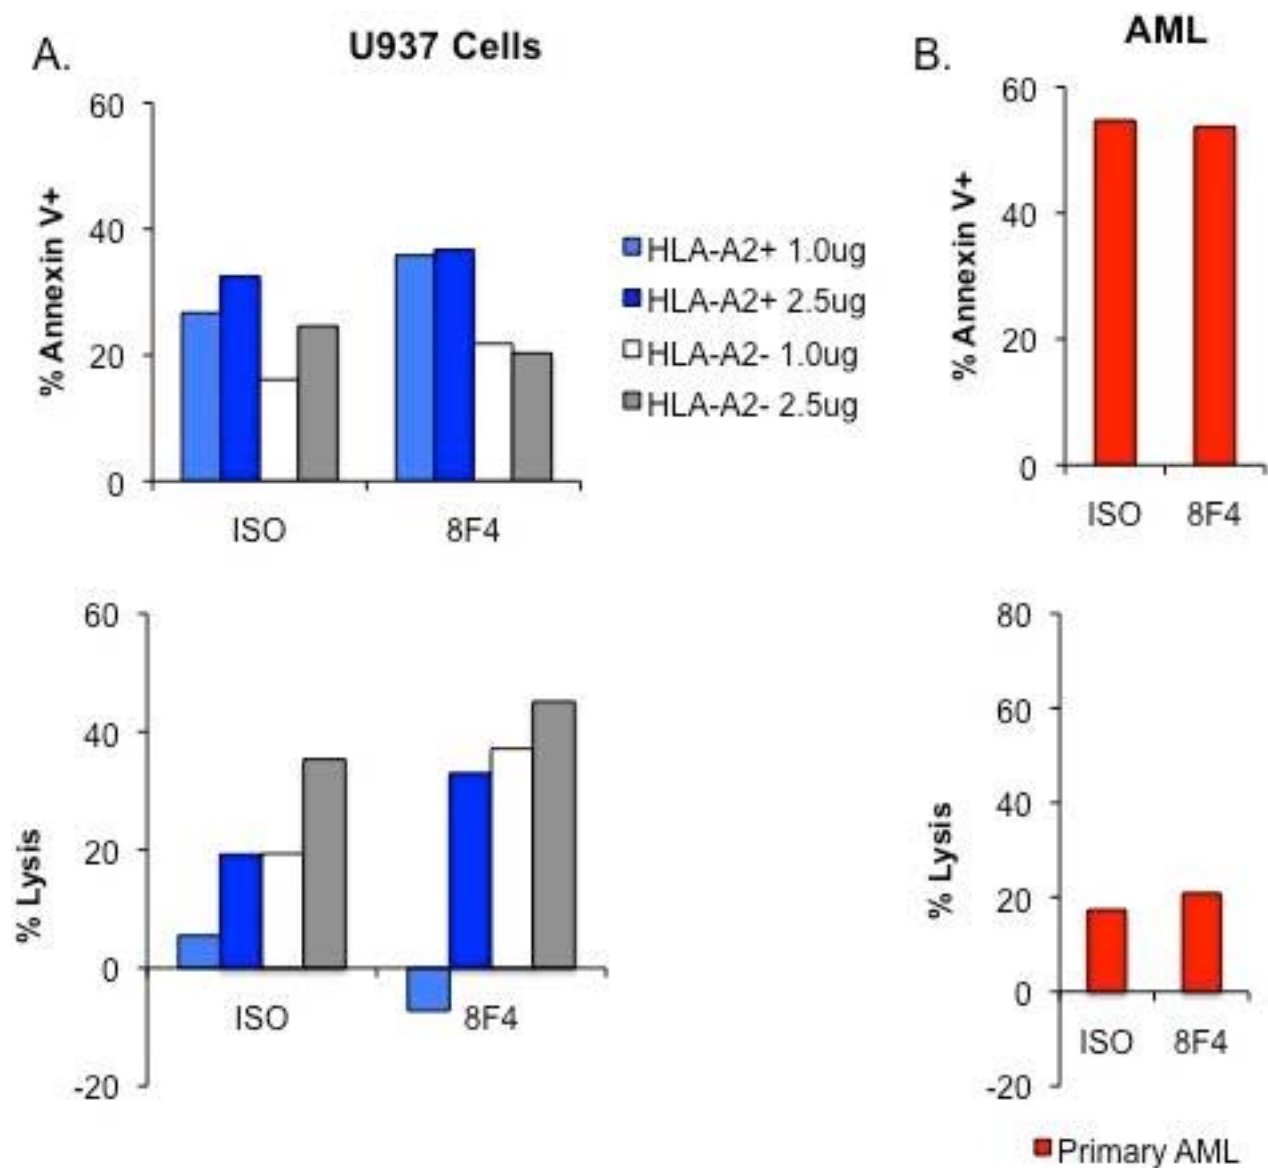

**Figure S4**

8F4 does not directly mediate apoptosis or cytolysis of PR1/HLA-A2+ cells. HLA-A2 transfected or non-transfected U937 cells or AML9 were plated in replicate with 8F4 or isotype control mAb for 12 hours-5 days. Cells were stained with Annexin V and Sytox Red, counted with counting beads and examined by flow cytometry. **(A)** Left panels show U937 at 60hrs and **(B)** right panels show HLA-A2+ blasts from patient AML9 after 36hrs. Upper panels in A and B show %Annexin V+ cells; whereas the lower panels show %Lysis relative to untreated viable cell counts.
